# Supplementary material for: Using the Prediction Model Risk of Bias Assessment Tool (PROBAST) to Evaluate Melanoma Prediction Studies
Source: MDPI journal article supplement (doi:10.3390/cancers14123033), 2022-06-20
Supplement: s1 [file s1]

Table S1: Decision rules for high and unclear PROBAST ratings

| Domain 1: Participants |                                                                                                                                                                                                                                                                                                                                                                                                                                                                                                                                                                                     |
|------------------------|-------------------------------------------------------------------------------------------------------------------------------------------------------------------------------------------------------------------------------------------------------------------------------------------------------------------------------------------------------------------------------------------------------------------------------------------------------------------------------------------------------------------------------------------------------------------------------------|
| ROB category           | Rules                                                                                                                                                                                                                                                                                                                                                                                                                                                                                                                                                                               |
| High                   | <ul style="list-style-type: none"> <li>• Case-control studies: hospital controls or cases from only one center</li> <li>• Cohorts: self-selected screening population, no population sampling</li> <li>• Pooled studies and meta-analyses: <ul style="list-style-type: none"> <li>- If at least one study is included that should be rated as high</li> </ul> </li> </ul>                                                                                                                                                                                                           |
| Unclear                | <ul style="list-style-type: none"> <li>• No or limited information on the study participants</li> <li>• Pooled studies and meta-analyses: <ul style="list-style-type: none"> <li>- If no references to the studies included were provided</li> </ul> </li> </ul>                                                                                                                                                                                                                                                                                                                    |
| Domain 2: Predictors   |                                                                                                                                                                                                                                                                                                                                                                                                                                                                                                                                                                                     |
| ROB category           | Rules                                                                                                                                                                                                                                                                                                                                                                                                                                                                                                                                                                               |
| High                   | <ul style="list-style-type: none"> <li>• Pooled studies: default is <b>high ROB</b>, as heterogeneity between studies is assumed. Exceptions: <ul style="list-style-type: none"> <li>- Justification was given that there was no heterogeneity e.g. because identical protocols were used to assess risk factors → <b>low ROB</b></li> <li>- Example from our studies: different assessment of number of nevi (nevi count on arms versus nevi count on whole body), but use of quantiles for risk model instead of absolute nevi counts [1] → <b>low ROB</b></li> </ul> </li> </ul> |
| Unclear                | <ul style="list-style-type: none"> <li>• Case-control studies: Use of risk factors for which recall bias is possible (especially risk factors related to UV exposure like “sunburns” and “sunbed use”)</li> <li>• No or limited information on the selection and assessment of predictors</li> </ul>                                                                                                                                                                                                                                                                                |
| Domain 3: Outcome      |                                                                                                                                                                                                                                                                                                                                                                                                                                                                                                                                                                                     |
| ROB category           | Rules                                                                                                                                                                                                                                                                                                                                                                                                                                                                                                                                                                               |

|                                                                           |                                                                                                                                                                                                                                                                                                                                                                          |
|---------------------------------------------------------------------------|--------------------------------------------------------------------------------------------------------------------------------------------------------------------------------------------------------------------------------------------------------------------------------------------------------------------------------------------------------------------------|
| High                                                                      | <ul style="list-style-type: none"> <li>• Multiple outcomes, not only melanoma (e.g., “severely dysplastic naevus/cannot exclude melanoma” [2])</li> <li>• Melanoma diagnosis not verified/histological confirmed (e.g. “suspected melanoma” [3])</li> <li>• Self-reported outcome e.g. lifetime melanoma via surveys</li> </ul>                                          |
| Unclear                                                                   | <ul style="list-style-type: none"> <li>• No or limited information on outcome</li> </ul>                                                                                                                                                                                                                                                                                 |
| <b>Domain 4: Analysis</b>                                                 |                                                                                                                                                                                                                                                                                                                                                                          |
| <b>ROB category</b>                                                       | <b>Rules</b>                                                                                                                                                                                                                                                                                                                                                             |
| High                                                                      | <ul style="list-style-type: none"> <li>• No validation (internal or external)<br/>Exception: prespecified models</li> <li>• No performance evaluation</li> <li>• Limited sample size concerning number of predictors</li> </ul>                                                                                                                                          |
| Unclear                                                                   | <ul style="list-style-type: none"> <li>• No or limited information on analysis</li> <li>• Components of the analysis whose impact on the results is unclear. E.g., ordinal incorporation of PRS [4], rounding of model coefficients to define the risk score [5], handling of ordinal variable as continuous variable [6]</li> </ul>                                     |
| <b>Overall ROB (according to the given rules in the PROBAST tool [7])</b> |                                                                                                                                                                                                                                                                                                                                                                          |
| <b>Low ROB:</b>                                                           | <p>If all domains were rated low ROB.</p> <p>If a prediction model was developed without any external validation, and it was rated as low risk of bias for all domains, consider downgrading to high ROB.</p> <p>Such a model can only be considered as low ROB, if the development was based on a very large data set and included some form of internal validation</p> |
| <b>High ROB:</b>                                                          | If at least one domain was judged to be at high ROB.                                                                                                                                                                                                                                                                                                                     |
| <b>Unclear ROB:</b>                                                       | If an unclear risk of bias was noted in at least one domain and all other domains were rated low ROB.                                                                                                                                                                                                                                                                    |

Generally, within the domains, if criteria suggest both a “high” and an “unclear” ROB, the category “high” should be chosen for being more specific.

## References

1. Davies, J.R.; Chang, Y.M.; Bishop, D.T.; Armstrong, B.K.; Bataille, V.; Bergman, W.; Berwick, M.; Bracci, P.M.; Elwood, J.M.; Ernstoff, M.S.; et al. Development and validation of a melanoma risk score based on pooled data from 16 case-control studies. *Cancer Epidemiol Biomarkers Prev* **2015**, *24*, 817-824, doi:10.1158/1055-9965.EPI-14-1062.
2. Guthrie, S.; Ramrath, K.; Dyll-Smith, D.; Landthaler, M.; Stolz, W. Development of a targeted risk-group model for skin cancer screening based on more than 100,000 total skin examinations. *J Eur Acad Dermatol Venereol* **2012**, *26*, 86-94, doi:10.1111/j.1468-3083.2011.04014.x.
3. Goldberg, M.S.; Doucette, J.T.; Lim, H.W.; Spencer, J.; Carucci, J.A.; Rigel, D.S. Risk factors for presumptive melanoma in skin cancer screening: American Academy of Dermatology National Melanoma/Skin Cancer Screening Program experience 2001-2005. *J Am Acad Dermatol* **2007**, *57*, 60-66, doi:10.1016/j.jaad.2007.02.010.
4. Gu, F.; Chen, T.H.; Pfeiffer, R.M.; Fargnoli, M.C.; Calista, D.; Ghiorzo, P.; Peris, K.; Puig, S.; Menin, C.; De Nicolo, A.; et al. Combining common genetic variants and non-genetic risk factors to predict risk of cutaneous melanoma. *Hum Mol Genet* **2018**, *27*, 4145-4156, doi:10.1093/hmg/ddy282.
5. Williams, L.H.; Shors, A.R.; Barlow, W.E.; Solomon, C.; White, E. Identifying Persons at Highest Risk of Melanoma Using Self-Assessed Risk Factors. *J Clin Exp Dermatol Res* **2011**, *2*, doi:10.4172/2155-9554.1000129.
6. Penn, L.A.; Qian, M.; Zhang, E.; Ng, E.; Shao, Y.; Berwick, M.; Lazovich, D.; Polsky, D. Development of a melanoma risk prediction model incorporating MC1R genotype and indoor tanning exposure: impact of mole phenotype on model performance. *PLoS One* **2014**, *9*, e101507, doi:10.1371/journal.pone.0101507.
7. Wolff, R.F.; Moons, K.G.M.; Riley, R.D.; Whiting, P.F.; Westwood, M.; Collins, G.S.; Reitsma, J.B.; Kleijnen, J.; Mallett, S.; Groupdagger, P. PROBAST: A Tool to Assess the Risk of Bias and Applicability of Prediction Model Studies. *Ann Intern Med* **2019**, *170*, 51-58, doi:10.7326/M18-1376.

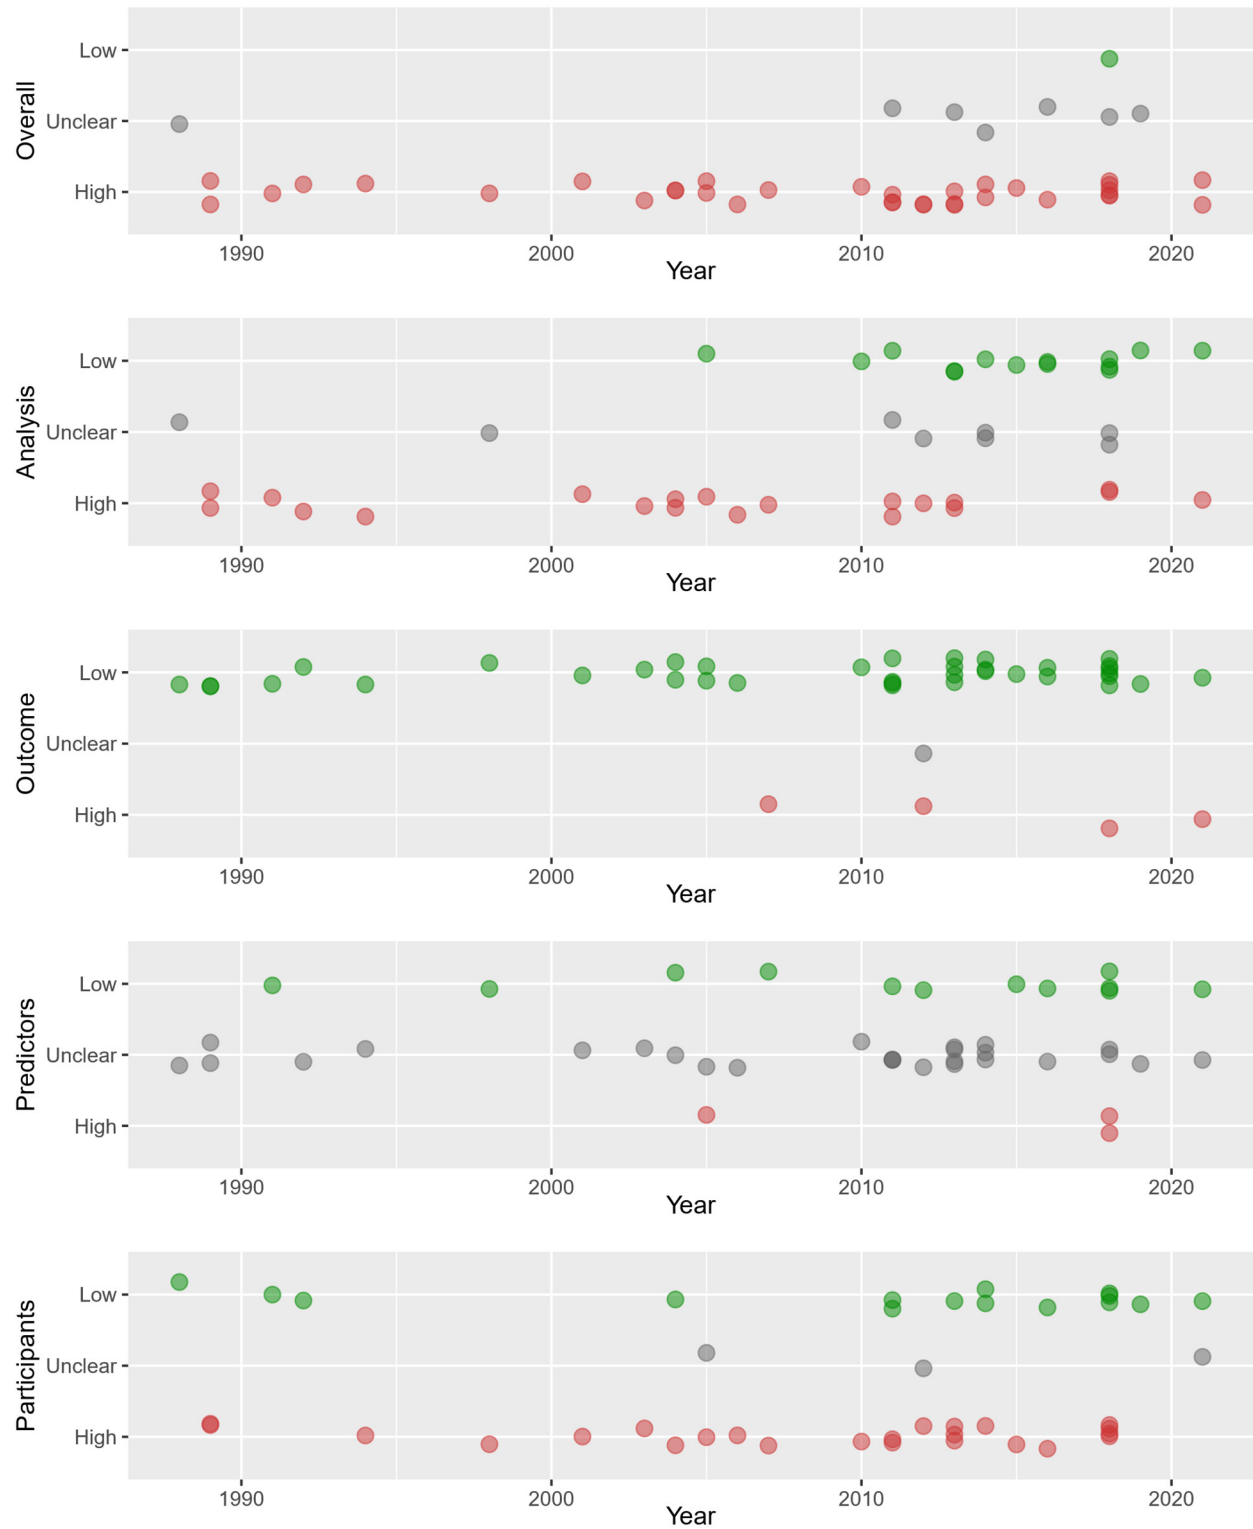

Figure S1: Distribution of overall and domain-specific ROB ratings over time (N=42 studies).
